# Supplementary material for: TS-AMIR: a topology string alignment method for intensive rapid protein structure comparison
Source: Springer Nature journal article supplement (doi:10.1186/1748-7188-7-4), 2012-02-15
Supplement: 13015_2011_141_MOESM3_ESM.pdf [file 13015_2011_141_MOESM3_ESM.pdf]

**Input:** Structure information of query and reference proteins.

**Output:** Matched SSEs list among query and reference proteins.

Let  $Q$  and  $R$  as Query and Reference proteins, respectively.

Let  $TS_Q$  and  $TS_R$  as Topology String of Query and Reference proteins, respectively.

Let  $P$  as an array of 24 permuted topology strings.

1.  $TS_Q \leftarrow \text{MakeTopologyString}(Q)$
2.  $P = \text{MakePermutedSequences}(TS_Q)$
3.  $TS_R \leftarrow \text{MakeTopologyString}(R)$
4.  $PS = H(TS_R, TS_R)$  // Perfect Score
5. **for**  $i=1$  **to** 24 **do**
6.      $D[i] = |H(TS_Q, TS_R) - PS|$
7. **end for**
8.  $i = \text{Min}(D)$
9. **for** n-gram =  $n$  **down to**  $m$  **do**
10.     **for each**  $W_i \in TS_R$  **do**
11.         **if** not matched ( $W_i$ ) **then**
12.             **Begin**
13.                  $j = \text{Search}(W_i, TS_Q)$
14.                 **if**  $j > 0$  **then** MarkSSEsMatched ( $W_i, W_j$ )
15.             **end if**
16.         **end for**
17. **end for**
