# Supplementary material for: TS-AMIR: a topology string alignment method for intensive rapid protein structure comparison
Source: Springer Nature journal article supplement (doi:10.1186/1748-7188-7-4), 2012-02-15

| Query protein |           | 24 permuted Topology strings | Reference protein | Topology String |
|---------------|-----------|------------------------------|-------------------|-----------------|
| 1SAR:A        | 1         | ISOUBVHRA                    | ...               |                 |
|               | 2         | MWPVARDQE                    | ...               |                 |
|               | 3         | NXLREQCUF                    | ...               |                 |
|               | ...       | ...                          | ...               |                 |
|               | <b>8</b>  | <b>LRNXCWESD</b>             | <b>1I2F:A</b>     |                 |
|               | ...       | ...                          | ...               |                 |
|               | <b>12</b> | <b>KTPWAUFQC</b>             | <b>1GMR:B</b>     |                 |
|               | ...       | ...                          | ...               |                 |
|               | 24        | ...                          | ...               |                 |

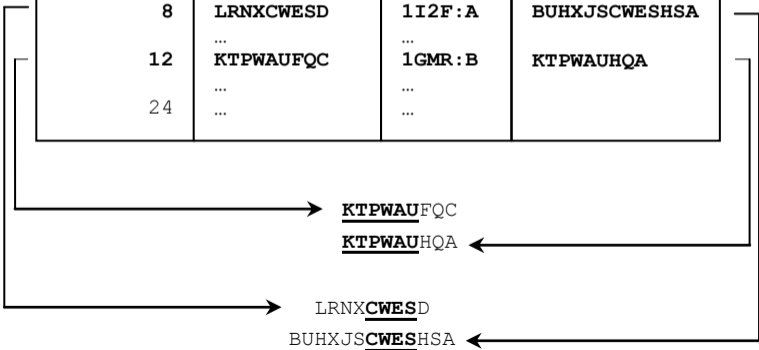

Supplement: 13015_2011_141_MOESM4_ESM.pdf [file 13015_2011_141_MOESM4_ESM.pdf]
