# Supplementary material for: TS-AMIR: a topology string alignment method for intensive rapid protein structure comparison
Source: Springer Nature journal article supplement (doi:10.1186/1748-7188-7-4), 2012-02-15

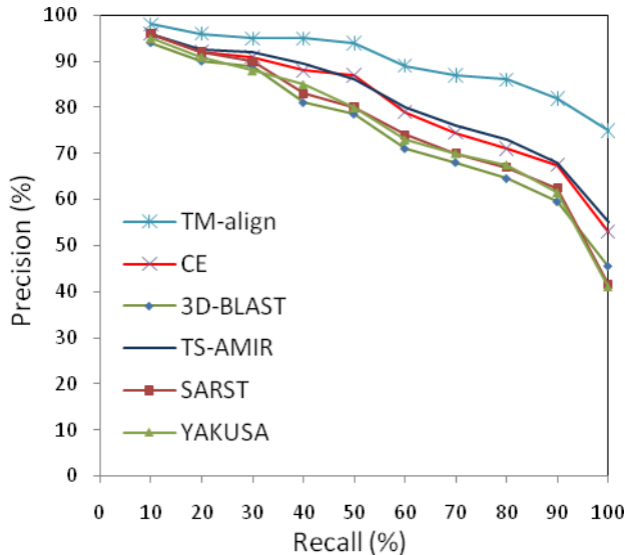

Supplement: 13015_2011_141_MOESM6_ESM.pdf [file 13015_2011_141_MOESM6_ESM.pdf]
